# Supplementary material for: Evolution of genes involved in feeding preference and metabolic processes in Calliphoridae (Diptera: Calyptratae)
Source: PeerJ journal article supplement (doi:10.7717/peerj.2598), 2016-10-27
Supplement: TableS2.pdf [file TableS2.pdf]

**Table S2. Candidate genes that failed to amplify in this study.** Several genes were selected for their potential involvement in feeding habits. However, some of these genes were not pursued in our analysis because we were not able to successfully amplify them in all target species.

| Gene                      | Symbol          | GO ID   | GO term                                | Category <sup>1</sup> | References                   |
|---------------------------|-----------------|---------|----------------------------------------|-----------------------|------------------------------|
| <i>AlphaTrypsin</i>       | <i>Alphatry</i> | 0006508 | “Proteolysis”                          | d                     | [1] Ross et al. 2003         |
| <i>Attacin-A</i>          | <i>AttA</i>     | 0019731 | “Antibacterial humoral response ”      | c                     | [2] Lemaitre et al. 1997     |
| calcium-binding protein 1 | <i>Cabp1</i>    | 0003756 | “Protein disulfide isomerase activity” | b                     | [3] Ashburn et al. 1999      |
| <i>Cyp12a4</i>            | <i>Cyp12a4</i>  | 0055114 | “Oxidation-reduction process”          | b                     | [4] Bogwitz et al. 2005      |
| <i>Cyp4d14</i>            | <i>Cyp4d14</i>  | 0055114 | “Oxidation-reduction process”          | b                     | [5] FlyBase et al. 2004      |
| <i>Diptericin A</i>       | <i>DptA</i>     | 0009617 | “ Response to bacterium”               | c                     | [6] Berkey et al. 2009       |
| <i>Hemolectin</i>         | <i>Hml</i>      | 0042060 | “Wound healing”                        | c                     | [7] Lesch et al. 2007        |
| <i>neuropeptide F</i>     | <i>NPF</i>      | 0030536 | “Larval feeding behavior”              | a                     | [8] Wu et al. 2003           |
| <i>ovo</i>                | <i>ovo</i>      | 0008343 | “Adult feeding behavior”               | a                     | [9] Wong et al. 2009         |
| <i>painless</i>           | <i>pain</i>     | 0042048 | “Olfactory behavior”                   | a                     | [10] Wang et al. 2011        |
| <i>scalloped</i>          | <i>sd</i>       | 0007423 | “Sensory organ development”            | a                     | [11] Srivastava & Bell. 2003 |
| <i>Serpin 55B</i>         | <i>Spn55B</i>   | 0045861 | “Negative regulation of proteolysis”   | d                     | [12] Han et al. 2000         |
| <i>shibire</i>            | <i>shi</i>      | 0030536 | “Larval feeding behavior”              | a                     | [13] Wu et al. 2005          |

<sup>1</sup> The selected genes can be classified in four categories: (a) genes involved in feeding preference; (b) genes involved in toxin metabolism that act in food detoxification; (c) genes involved in immune responses; and (d) genes involved in wound formation that allow larvae to move around the wound during feeding.

[1] Ross J, Jiang H, Kanost MR, and Wang Y. 2003. Serine proteases and their homologs in the *Drosophila melanogaster* genome: an initial analysis of sequence conservation and phylogenetic relationships. *Gene* 304:117-131.

[2] Lemaitre B, Reichhart JM, and Hoffmann JA. 1997. *Drosophila* host defense: differential induction of antimicrobial peptide genes after infection by various classes of microorganisms. *Proc Natl Acad Sci U S A* 94:14614-14619.

[3] Ashburner M, Misra S, Roote J, Lewis SE, Blazej R, Davis T, Doyle C, Galle R, George R, Harris N, Hartzell G, Harvey D, Hong L, Houston K, Hoskins R, Johnson G, Martin C, Moshrefi A, Palazzolo M, Reese MG, Spradling A, Tsang G, Wan K, Whitelaw K, Celniker S, and et al. 1999. An exploration of the sequence of a 2.9-Mb region of the genome of *Drosophila melanogaster*: the *Adh* region. *Genetics* 153:179-219.

[4] Bogwitz MR, Chung H, Magoc L, Rigby S, Wong W, O’Keefe M, McKenzie JA, Batterham P, and Daborn PJ. 2005. *Cyp12a4* confers lufenuron resistance in a natural population of *Drosophila melanogaster*. *Proc Natl Acad Sci U S A* 102:12807-12812. 10.1073/pnas.0503709102

- [5] FlyBase C, Swiss-Prot Project M, and InterPro Project M. 2004. Gene Ontology annotation in FlyBase through association of InterPro records with GO terms.
- [6] Berkey CD, Blow N, and Watnick PI. 2009. Genetic analysis of *Drosophila melanogaster* susceptibility to intestinal *Vibrio cholerae* infection. *Cell Microbiol* 11:461-474. 10.1111/j.1462-5822.2008.01267.x
- [7] Lesch C, Goto A, Lindgren M, Bidla G, Dushay MS, and Theopold U. 2007. A role for Hemolectin in coagulation and immunity in *Drosophila melanogaster*. *Dev Comp Immunol* 31:1255-1263.
- [8] Wu Q, Wen T, Lee G, Park JH, Cai HN, and Shen P. 2003. Developmental control of foraging and social behavior by the *Drosophila* neuropeptide Y-like system. *Neuron* 39:147-161.
- [9] Wong R, Piper MD, Wertheim B, and Partridge L. 2009. Quantification of food intake in *Drosophila*. *PLoS One* 4:e6063. 10.1371/journal.pone.0006063
- [10] Wang K, Guo Y, Wang F, and Wang Z. 2011. *Drosophila* TRPA channel painless inhibits male-male courtship behavior through modulating olfactory sensation. *PLoS One* 6:e25890. 10.1371/journal.pone.0025890
- [11] Srivastava A, and Bell JB. 2003. Further developmental roles of the Vestigial/Scalloped transcription complex during wing development in *Drosophila melanogaster*. *Mech Dev* 120:587-596.
- [12] Han J, Zhang H, Min G, Kemler D, and Hashimoto C. 2000. A novel *Drosophila* serpin that inhibits serine proteases. *FEBS Lett* 468:194-198.
- [13] Wu Q, Zhang Y, Xu J, and Shen P. 2005. Regulation of hunger-driven behaviors by neural ribosomal S6 kinase in *Drosophila*. *Proc Natl Acad Sci U S A* 102:13289-13294. 10.1073/pnas.0501914102.
